# Supplementary material for: A kinetic description of how interfaces accelerate reactions in micro-compartments
Source: PubMed Central journal article supplement — Chem Sci. 2020 Jul 27;11(32):8533–45. doi: 10.1039/d0sc03189e (PMC8163377; doi:10.1039/d0sc03189e), 2020-07-27
Supplement: SC-011-D0SC03189E-s001.pdf [file SC-011-D0SC03189E-s001.pdf]

Supporting Information for

# A Kinetic Description of How Interfaces Accelerate Reactions in Micro-compartments

Kevin R. Wilson,<sup>1,\*</sup> Alexander M. Prophet,<sup>1,2</sup> Grazia Rovelli,<sup>1</sup> Megan D. Willis,<sup>1</sup> Rebecca J. Rapf,<sup>1</sup> and Michael I. Jacobs<sup>3</sup>

<sup>1</sup>*Chemical Sciences Division, Lawrence Berkeley National Laboratory, Berkeley CA, 94720, USA*

<sup>2</sup>*Department of Chemistry, University of California, Berkeley CA, 94720, USA*

<sup>3</sup>*Beckman Institute for Advanced Science and Technology, University of Illinois at Urbana-Champaign, Urbana, Illinois 61801, USA*

\*Corresponding author: Kevin R. Wilson (email: krwilson@lbl.gov)

ORCID: Kevin R. Wilson, 0000-0003-0264-0872

This file contains supplementary Tables S1 and S2 and Figure S1-S7

**Table S1:** Computed fraction of molecules at the surface of a sphere with radius, R, compared with the rectangular prism simulation geometry.

| R (μm) | <i>Rectangular Prism</i> |        |                                         | <i>Sphere</i>         |                       |                                         |
|--------|--------------------------|--------|-----------------------------------------|-----------------------|-----------------------|-----------------------------------------|
|        | Surface #                | Bulk # | $f_{\text{surface}}$                    | Surface #             | Bulk #                | $f_{\text{surface}}$                    |
| 1      | 1.66                     | 3.011  | <b>0.554</b>                            | $2.09 \times 10^7$    | $3.78 \times 10^7$    | <b>0.554</b>                            |
| 10     | 1.66                     | 30.11  | <b>0.0554</b>                           | $2.09 \times 10^9$    | $3.78 \times 10^{10}$ | <b>0.0554</b>                           |
| 100    | 1.66                     | 301.1  | <b><math>5.54 \times 10^{-3}</math></b> | $2.09 \times 10^{11}$ | $3.78 \times 10^{13}$ | <b><math>5.54 \times 10^{-3}</math></b> |
| 1000   | 1.66                     | 3011   | <b><math>5.54 \times 10^{-4}</math></b> | $2.09 \times 10^{13}$ | $3.78 \times 10^{16}$ | <b><math>5.54 \times 10^{-4}</math></b> |
| 10000  | 1.66                     | 30110  | <b><math>5.54 \times 10^{-5}</math></b> | $2.09 \times 10^{15}$ | $3.78 \times 10^{19}$ | <b><math>5.54 \times 10^{-5}</math></b> |

**Table S2:** The set of elementary reaction and diffusion steps and rate coefficients used in stochastic simulations 1 and 2.

| No.                 | Elementary Step                                         | Simulation 1             | Simulation 2             | units                           | Ref. |
|---------------------|---------------------------------------------------------|--------------------------|--------------------------|---------------------------------|------|
|                     | Surface<br>Compartment                                  | Rate<br>Coefficient      | Rate<br>Coefficient      |                                 |      |
| 1                   | Amine + Site $\rightarrow$ Amine_ads                    | 0.066                    | See Sim. 1               | M <sup>-1</sup> s <sup>-1</sup> | 1    |
| 2                   | Amine_ads $\rightarrow$ Amine + Site                    | 1.10 x 10 <sup>-3</sup>  | See Sim. 1               | s <sup>-1</sup>                 | 1    |
| 3                   | Aldehyde + Site $\rightarrow$ Aldehyde_ads              | 0.120                    | See Sim. 1               | M <sup>-1</sup> s <sup>-1</sup> | 1    |
| 4                   | Aldehyde_ads $\rightarrow$ Aldehyde + Site              | 8.0 x 10 <sup>-4</sup>   | See Sim. 1               | s <sup>-1</sup>                 | 1    |
| 5                   | Imine + Site $\rightarrow$ Imine_ads                    | 0.120                    | See Sim. 1               | M <sup>-1</sup> s <sup>-1</sup> | 1    |
| 6                   | Imine_ads $\rightarrow$ Imine + Site                    | 2                        | See Sim. 1               | s <sup>-1</sup>                 | 2, a |
| 7                   | Amine_ads + Aldehyde_Ads $\rightarrow$ Imine_ads + Site | 1.54 x 10 <sup>-3</sup>  | 3.22 x 10 <sup>-3</sup>  | M <sup>-1</sup> s <sup>-1</sup> | 3    |
| 8                   | Imine_ads $\rightarrow$ Amine_ads + Aldehyde_Ads        | 1.52 x 10 <sup>-3</sup>  | See Sim. 1               | s <sup>-1</sup>                 | 2    |
|                     |                                                         |                          |                          |                                 |      |
| Diffusion Pathways  |                                                         | Diffusion<br>Coefficient | Diffusion<br>Coefficient |                                 |      |
| 9                   | Amine (Bulk) $\leftrightarrow$ Amine (Surface)          | 5.02 x 10 <sup>-6</sup>  | See Sim. 1               | cm <sup>2</sup> s <sup>-1</sup> | 2    |
| 10                  | Aldehyde (Bulk) $\leftrightarrow$ Aldehyde (Surface)    | 4.46 x 10 <sup>-6</sup>  | See Sim. 1               | cm <sup>2</sup> s <sup>-1</sup> | 2    |
| 11                  | Imine (Bulk) $\leftrightarrow$ Imine (Surface)          | 2.39 x 10 <sup>-6</sup>  | See Sim. 1               | cm <sup>2</sup> s <sup>-1</sup> | 2    |
|                     |                                                         |                          |                          |                                 |      |
| Bulk<br>Compartment |                                                         | Rate<br>Coefficient      | Rate<br>Coefficient      |                                 |      |
| 12                  | Amine + Aldehyde $\rightarrow$ Imine                    | 2.60 x 10 <sup>-5</sup>  | See Sim. 1               | M <sup>-1</sup> s <sup>-1</sup> | 2    |
| 13                  | Imine $\rightarrow$ Amine + Aldehyde                    | 1.52 x 10 <sup>-3</sup>  | See Sim. 1               | s <sup>-1</sup>                 | 2    |

<sup>a</sup> The value of this rate coefficient is selected to produce simulation results consistent with the experimental observations in Ref. <sup>2</sup>

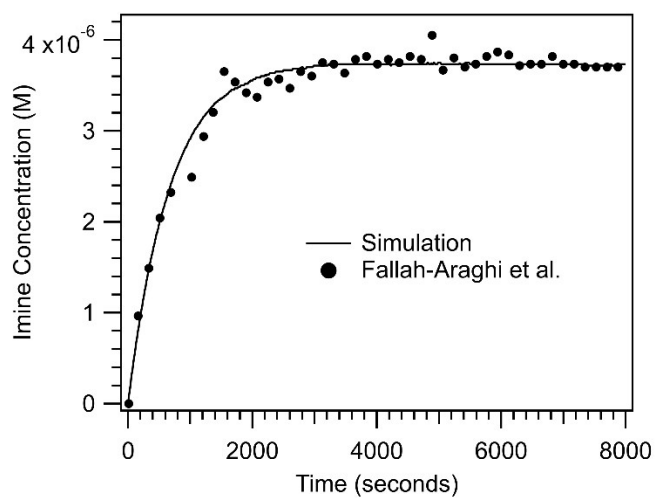

**Figure S1:** Imine concentration vs. reaction time measured in a bulk solution. Points are data reproduced from Ref. <sup>2</sup> and the line is a fit from simulations in order to constrain the forward and reverse rates for the bulk reaction (Steps 12 and 13 Table 2).

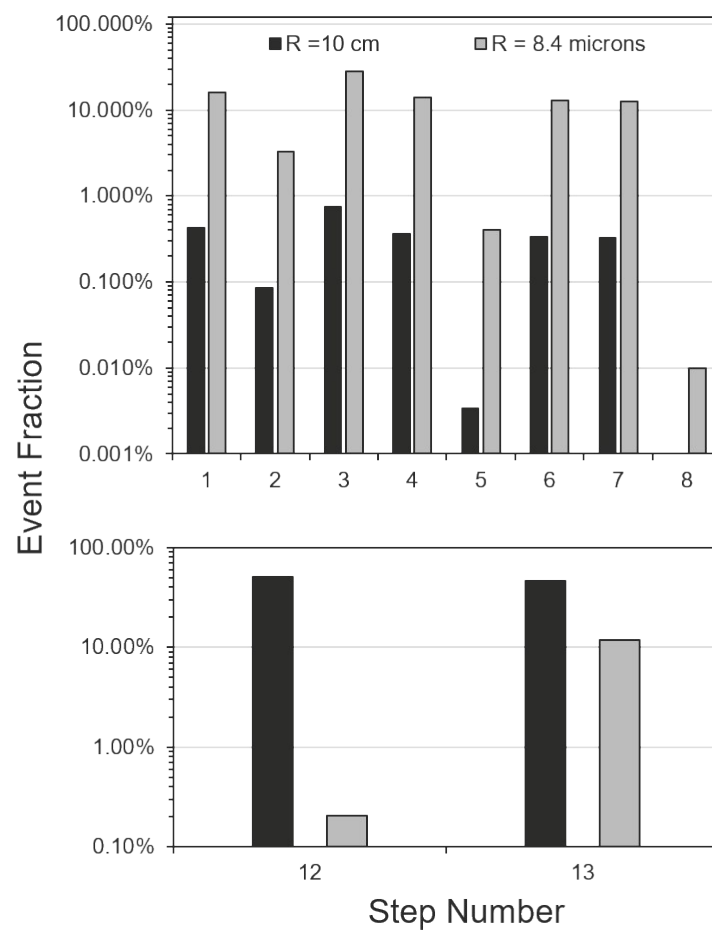

**Figure S2:** Event fraction in the surface (top) and bulk (bottom) compartments as a function of reaction step number (see Table 2) for  $R=8.4\ \mu\text{m}$  and  $R = 10\ \text{cm}$ .

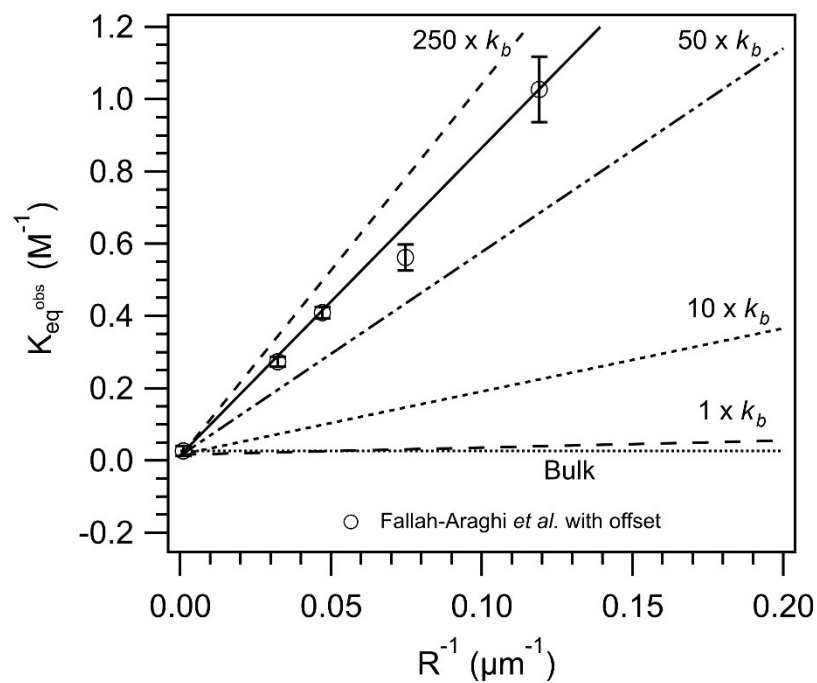

**Figure S3:** Sensitivity of simulated  $K_{eq}^{obs}$  vs.  $R^{-1}$  for [amine]=[aldehyde] = 15mM. Lines represent different simulated values for the surface forward rate coefficient for imine synthesis (Step 7, Table S2). These rate coefficients are expressed as multiples of the bulk value ( $k_b$ ) (see Step 12, Table S2).

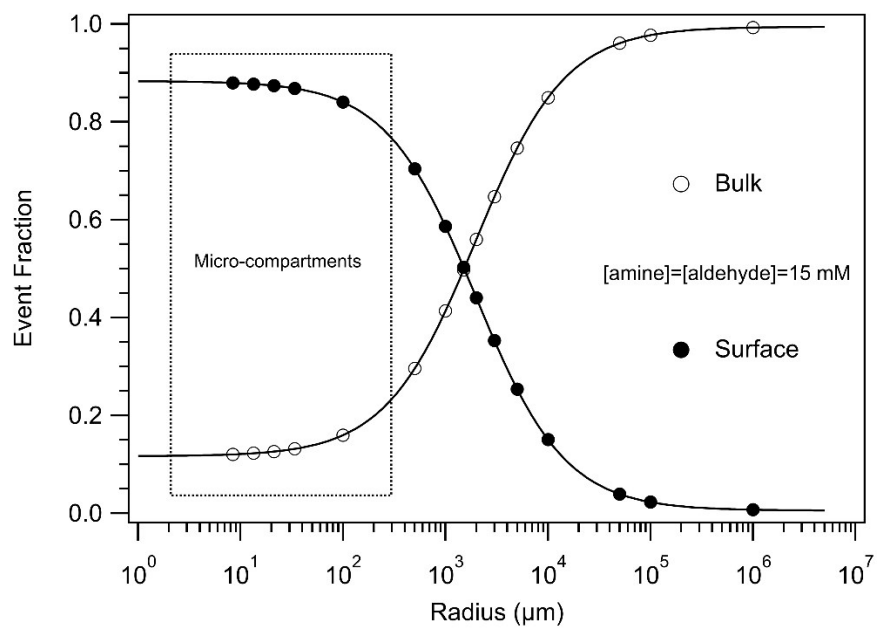

**Figure S4:** Bulk and surface event fractions as a function of radius for simulation 2 ([amine]=[aldehyde]=15 mM). Lines are guides for the eye.

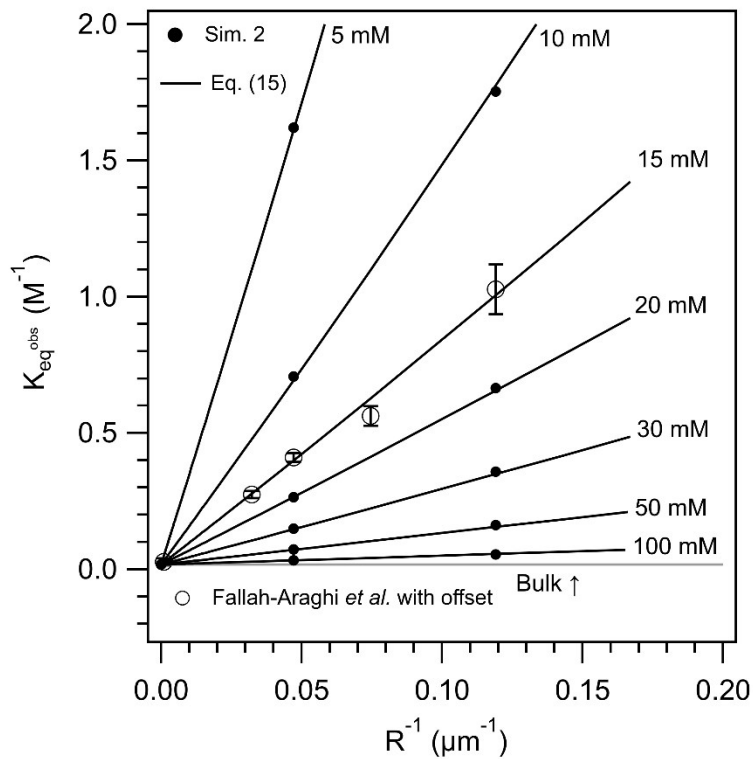

**Figure S5:**  $K_{eq}^{obs}$  vs.  $R^{-1}$  and concentration for [amine]=[aldehyde]. Comparison of experimental data from Ref. <sup>2</sup>, results from simulation 2 and predictions from Eq. (15).  $K_{eq}^B = 0.017 M^{-1}$  and is shown in the figure as a gray line.

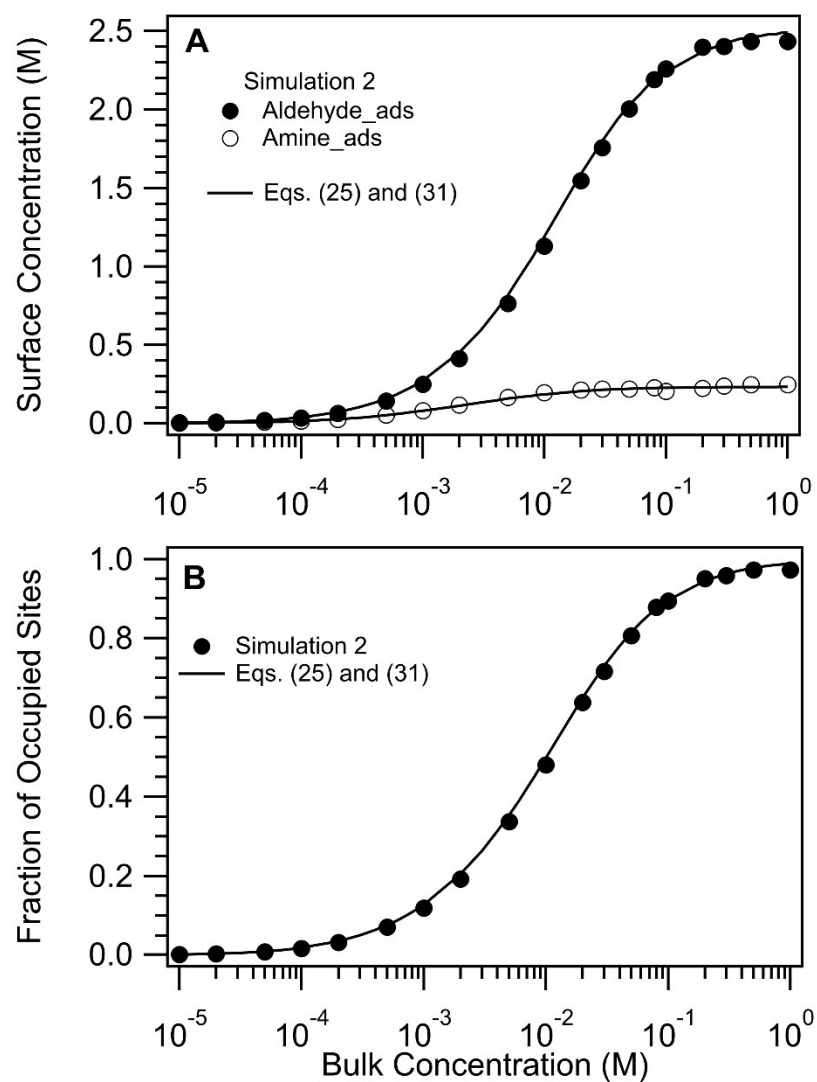

**Figure S6:** Surface concentrations of (A) adsorbed amine and aldehyde and (B) fraction of occupied surface sites vs. bulk concentration for  $R = 8.4 \mu\text{m}$ . Simulation 2 results (points) are compared with predictions from Eqs. (31) and (25).

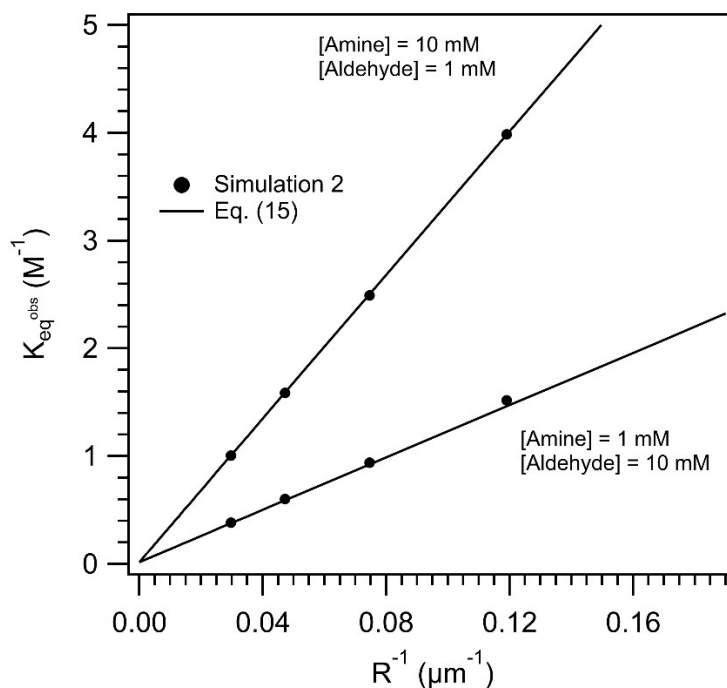

**Figure S7:**  $K_{eq}^{obs}$  vs.  $R^{-1}$  for non-stoichiometric reactant concentrations (i.e. [amine]  $\neq$  [aldehyde]): simulation 2 (points) and prediction (lines) from Eq. (15).

### Supporting References

1. Tomoaia, G.; Tomoaia-Cotisel, A.; Tomoaia-Cotisel, M.; Mocanu, A., Kinetic study of adsorption of some biocompounds at the oil/water interface. *Cent. Eur. J. Chem.* **2005**, *3*, (2), 347-360.
2. Fallah-Araghi, A.; Meguellati, K.; Baret, J.-C.; Harrak, A. E.; Mangeat, T.; Karplus, M.; Ladame, S.; Marques, C. M.; Griffiths, A. D., Enhanced Chemical Synthesis at Soft Interfaces: A Universal Reaction-Adsorption Mechanism in Microcompartments. *Phys. Rev. Lett.* **2014**, *112*, (2), 028301.

3. Meguellati, K.; Fallah-Araghi, A.; Baret, J.-C.; El Harrak, A.; Mangeat, T.; Marques, C. M.; Griffiths, A. D.; Ladame, S., Enhanced imine synthesis in water: from surfactant-mediated catalysis to host–guest mechanisms. *Chem. Commun.* **2013**, 49, (96), 11332-11334.
